# Supplementary material for: Spatial benthic community analysis of shallow coral reefs to support coastal management in Culebra Island, Puerto Rico
Source: PeerJ. 2020 Oct 14;8:e10080. doi: 10.7717/peerj.10080 (PMC7568481; doi:10.7717/peerj.10080)
Supplement: Supplemental Information 19 [file peerj-08-10080-s019.xlsx]

## Sheet: % Cuadrat  Level
BENTHIC PARAMETERS	A1-1	A1-2	A1-3	A1-4	A1-5	A1-6	A2-1	A2-2	A2-3	A2-4	A2-5	A2-6	A3-1	A3-2	A3-3	A3-4	A3-5	A3-6	A4-1	A4-2	A4-3	A4-4	A4-5	A4-6	A5-1	A5-2	A5-3	A5-4	A5-5	A5-6	B1-1	B1-2	B1-3	B1-4	B1-5	B1-6	B2-1	B2-2	B2-3	B2-4	B2-5	B2-6	B3-1	B3-2	B3-3	B3-4	B3-5	B3-6	B4-1
Corals	14.5833	20.8333	8.33333	0	25	10.4167	18.75	41.6667	2.08333	8.33333	0	4.16667	39.5833	0	27.0833	33.3333	12.5	27.0833	20.8333	10.4167	0	0	0	8.33333	29.1667	0	14.5833	16.6667	35.4167	35.4167	0	0	10.4167	0	8.33333	2.08333	6.25	0	0	0	0	0	10.4167	0	6.25	0	0	16.6667	0
Gorgonians	0	0	18.75	0	4.16667	10.4167	2.08333	0	8.33333	33.3333	0	29.1667	10.4167	0	0	0	4.16667	0	0	8.33333	0	4.16667	0	37.5	41.6667	18.75	0	12.5	0	0	0	14.5833	0	14.5833	0	0	37.5	2.08333	0	0	0	0	27.0833	14.5833	14.5833	0	41.6667	0	0
Sponges	0	0	0	0	0	0	0	0	0	0	0	0	0	0	0	0	0	0	0	0	0	0	0	0	0	0	0	0	0	0	0	0	0	0	0	0	0	0	0	0	0	0	0	0	0	0	0	0	0
Zoanthids	0	0	0	0	0	0	0	0	0	0	0	0	0	0	0	0	0	0	0	0	0	0	0	0	0	0	0	0	0	0	0	0	0	0	0	0	0	0	0	0	0	0	0	0	16.6667	0	0	0	0
Other Live	0	2.08333	0	0	0	0	0	0	0	0	0	0	0	0	0	0	0	0	29.1667	0	0	0	0	0	0	0	0	0	0	0	0	0	0	0	0	0	0	0	0	2.08333	0	0	0	0	0	0	0	0	0
Macroalgae	47.9167	52.0833	20.8333	16.6667	27.0833	20.8333	58.3333	22.9167	43.75	29.1667	22.9167	27.0833	12.5	33.3333	31.25	47.9167	47.9167	31.25	0	0	68.75	68.75	54.1667	10.4167	14.5833	47.9167	27.0833	31.25	29.1667	33.3333	37.5	29.1667	37.5	25	33.3333	20.8333	31.25	37.5	18.75	16.6667	27.0833	33.3333	27.0833	35.4167	43.75	39.5833	50	33.3333	41.6667
Turf	2.08333	10.4167	14.5833	16.6667	20.8333	14.5833	10.4167	10.4167	8.33333	4.16667	14.5833	20.8333	12.5	8.33333	12.5	0	22.9167	12.5	18.75	31.25	0	10.4167	14.5833	22.9167	8.33333	12.5	20.8333	6.25	2.08333	22.9167	35.4167	29.1667	18.75	25	4.16667	35.4167	8.33333	16.6667	50	31.25	14.5833	6.25	14.5833	14.5833	10.4167	29.1667	4.16667	4.16667	16.6667
Crustose Coralline Algae	6.25	4.16667	4.16667	2.08333	0	0	2.08333	2.08333	12.5	6.25	0	0	8.33333	10.4167	0	0	2.08333	6.25	0	4.16667	0	8.33333	0	0	0	2.08333	16.6667	14.5833	6.25	4.16667	0	0	0	0	0	33.3333	16.6667	43.75	31.25	37.5	43.75	60.4167	8.33333	35.4167	4.16667	10.4167	4.16667	31.25	37.5
Erect Calcareous Algae	2.08333	0	0	2.08333	2.08333	0	6.25	4.16667	6.25	0	0	0	0	12.5	4.16667	0	0	0	4.16667	14.5833	0	0	0	6.25	0	0	0	6.25	8.33333	0	0	0	0	0	14.5833	0	0	0	0	0	0	0	0	0	0	0	0	6.25	4.16667
Cyanobacteria	0	0	4.16667	6.25	0	0	2.08333	2.08333	0	2.08333	0	0	0	0	14.5833	0	2.08333	0	0	14.5833	0	0	8.33333	0	0	4.16667	0	6.25	0	4.16667	16.6667	8.33333	14.5833	29.1667	6.25	8.33333	0	0	0	8.33333	14.5833	0	8.33333	0	4.16667	12.5	0	0	0
Pavement	0	0	0	0	0	0	0	4.16667	0	0	0	2.08333	0	0	0	0	2.08333	0	0	0	0	0	4.16667	0	0	0	0	0	0	0	0	14.5833	0	0	0	0	0	0	0	0	0	0	0	0	0	0	0	2.08333	0
Rubble	0	0	14.5833	22.9167	10.4167	29.1667	0	4.16667	0	6.25	29.1667	0	0	0	0	0	0	0	0	8.33333	0	0	0	0	0	0	12.5	0	0	0	0	0	0	0	25	0	0	0	0	2.08333	0	0	0	0	0	0	0	0	0
Sand	27.0833	10.4167	14.5833	33.3333	10.4167	14.5833	0	8.33333	18.75	10.4167	33.3333	16.6667	16.6667	35.4167	10.4167	18.75	6.25	22.9167	27.0833	8.33333	31.25	8.33333	18.75	14.5833	6.25	14.5833	8.33333	6.25	18.75	0	10.4167	4.16667	18.75	6.25	8.33333	0	0	0	0	2.08333	0	0	4.16667	0	0	8.33333	0	6.25	0
Number of visitors	7	7	7	7	7	7	7	7	7	7	7	7	7	7	7	7	7	7	7	7	7	7	7	7	7	7	7	7	7	7	3.8571	3.8571	3.8571	3.8571	3.8571	3.8571	3.8571	3.8571	3.8571	3.8571	3.8571	3.8571	3.8571	3.8571	3.8571	3.8571	3.8571	3.8571	3.8571
Diadema Density	2	2	2	2	2	2	3	3	3	3	3	3	0	0	0	0	0	0	0	0	0	0	0	0	1	1	1	1	1	1	0.25	0.25	0.25	0.25	0.25	0.25	0.05	0.05	0.05	0.05	0.05	0.05	0.2	0.2	0.2	0.2	0.2	0.2	0.1
Coral Recruitment Density	0	2	6	6	2	4	0	0	0	0	0	4	0	0	0	0	0	0	0	0	0	0	0	0	0	0	0	0	0	0	0	0	0	0	0	2	0	0	0	0	0	0	0	0	0	0	0	0	0
Rugosity Ratio Index	1.368	1.368	1.368	1.368	1.368	1.368	1.566	1.566	1.566	1.566	1.566	1.566	1.858	1.858	1.858	1.858	1.858	1.858	1.728	1.728	1.728	1.728	1.728	1.728	1.43	1.43	1.43	1.43	1.43	1.43	1.614	1.614	1.614	1.614	1.614	1.614	1.977	1.977	1.977	1.977	1.977	1.977	1.87	1.87	1.87	1.87	1.87	1.87	1.882
Percent of Diseased Corals	0	0	0	0	0	0	10	10	10	10	10	10	66.6667	66.6667	66.6667	66.6667	66.6667	66.6667	100	100	100	100	100	100	8.33333	8.33333	8.33333	8.33333	8.33333	8.33333	0	0	0	0	0	0	0	0	0	0	0	0	20	20	20	20	20	20	0
Taxonomic Distinctness (Δ*)	0	0	83.3333	0	70.892	81.0345	83.3333	55.5556	83.3333	67.2043	0	83.3333	52.0484	0	16.6667	0	83.3333	66.6667	0	83.3333	0	0	0	83.3333	83.3333	0	0	83.3333	0	0	0	66.6667	0	0	0	0	65.1261	0	0	0	0	0	74.9042	51.5152	77.957	0	41.6092	0	0
Variation in Taxonomic Distinctness (Λ+)	0	0	0	0	113.889	61.7284	0	61.7284	0	246.914	0	0	987.654	0	0	0	0	0	0	0	0	0	0	0	0	0	0	0	0	0	0	0	0	0	0	0	246.914	0	0	0	0	0	246.914	246.914	61.7284	0	191.667	0	0
S	1	1	2	0	5	3	2	3	2	3	0	2	3	0	2	1	2	2	1	2	0	1	0	2	2	1	1	2	1	1	0	2	1	1	1	1	3	1	0	0	0	0	3	3	3	0	5	1	0
J	0	0	0.890492	0	0.893294	0.858673	0.468996	0.817345	0.721928	0.937231	0	0.543564	0.940044	0	0.890492	0	0.811278	0.890492	0	0.991076	0	0	0	0.684038	0.977418	0	0	0.985228	0	0	0	0.863121	0	0	0	0	0.834282	0	0	0	0	0	0.820043	0.724834	0.937231	0	0.879203	0	0
H'(loge)	0	0	0.617242	0	1.4377	0.943348	0.325083	0.897946	0.500402	1.02965	0	0.37677	1.03274	0	0.617242	0	0.562335	0.617242	0	0.686962	0	0	0	0.474139	0.677494	0	0	0.682908	0	0	0	0.59827	0	0	0	0	0.916553	0	0	0	0	0	0.900909	0.796312	1.02965	0	1.41502	0	0
Transect	A1	A1	A1	A1	A1	A1	A2	A2	A2	A2	A2	A2	A3	A3	A3	A3	A3	A3	A4	A4	A4	A4	A4	A4	A5	A5	A5	A5	A5	A5	B1	B1	B1	B1	B1	B1	B2	B2	B2	B2	B2	B2	B3	B3	B3	B3	B3	B3	B4
Locality	A	A	A	A	A	A	A	A	A	A	A	A	A	A	A	A	A	A	A	A	A	A	A	A	A	A	A	A	A	A	B	B	B	B	B	B	B	B	B	B	B	B	B	B	B	B	B	B	B
Distance	Nearshore	Nearshore	Nearshore	Nearshore	Nearshore	Nearshore	Nearshore	Nearshore	Nearshore	Nearshore	Nearshore	Nearshore	Nearshore	Nearshore	Nearshore	Nearshore	Nearshore	Nearshore	Nearshore	Nearshore	Nearshore	Nearshore	Nearshore	Nearshore	Nearshore	Nearshore	Nearshore	Nearshore	Nearshore	Nearshore	Nearshore	Nearshore	Nearshore	Nearshore	Nearshore	Nearshore	Nearshore	Nearshore	Nearshore	Nearshore	Nearshore	Nearshore	Nearshore	Nearshore	Nearshore	Nearshore	Nearshore	Nearshore	Nearshore
Recreation Index	High	High	High	High	High	High	High	High	High	High	High	High	High	High	High	High	High	High	High	High	High	High	High	High	High	High	High	High	High	High	Moderate	Moderate	Moderate	Moderate	Moderate	Moderate	Moderate	Moderate	Moderate	Moderate	Moderate	Moderate	Moderate	Moderate	Moderate	Moderate	Moderate	Moderate	Moderate
Topographic Complexity	M	M	M	M	M	M	MH	MH	MH	MH	MH	MH	H	H	H	H	H	H	MH	MH	MH	MH	MH	MH	M	M	M	M	M	M	MH	MH	MH	MH	MH	MH	H	H	H	H	H	H	H	H	H	H	H	H	H
Diadema Index	Poor	Poor	Poor	Poor	Poor	Poor	Critical	Critical	Critical	Critical	Critical	Critical	Poor	Poor	Poor	Poor	Poor	Poor	Critical	Critical	Critical	Critical	Critical	Critical	Poor	Poor	Poor	Poor	Poor	Poor	Poor	Poor	Poor	Poor	Poor	Poor	Critical	Critical	Critical	Critical	Critical	Critical	Critical	Critical	Critical	Critical	Critical	Critical	Critical
[truncated: 191 more columns]

## Sheet:  % at Transect Level
					15.4861
BENTHIC PARAMETERS	A1	A2	A3	A4	A5	B1	B2	B3	B4	B5	C1	C2	C3	C4	C5	D1	D2	D3	D4	D5	E1	E2	E3	E4	E5	F1	F2	F3	F4	F5	G1	G2	G3	G4	G5	H1	H2	H3	H4	H5
Corals	13.1944	12.5	23.2639	6.59722	21.875	3.47222	1.04167	5.55556	1.73611	5.55556	15.625	8.68056	18.75	17.3611	27.4306	18.0556	20.8333	25	45.8333	35.7639	13.1944	15.2778	11.4583	6.94444	32.6389	7.63889	12.5	18.4028	20.4861	19.4444	28.125	17.7083	34.0278	26.3889	10.7639	3.81944	5.90278	21.5278	10.7639	23.2639
Gorgonias	5.55556	12.1528	2.43056	8.33333	12.1528	4.86111	6.59722	16.3194	9.02778	4.16667	5.20833	4.16667	12.5	23.9583	6.25	6.94444	11.1111	14.5833	7.29167	10.0694	15.9722	1.04167	0	0	2.77778	20.8333	12.5	31.25	13.5417	12.5	20.4861	18.75	13.1944	11.8056	11.8056	10.4167	16.3194	3.81944	12.8472	19.4444
Antipatharians	0	0	0	0	0	0	0	0	0	0	0	0	0	0	0	0	0	0	0	0	0	0	0	0	0	0	0	0	0	0	0	0	0	0	0	0	0	0	0	0
Sponges	0	0	0	0	0	0	0	0	2.08333	0	0	0	0	0	0	0	0	0	0	0.694444	0	0	0	0	0	0	0	0.347222	0.347222	0.347222	0	0	0	2.08333	0	0	0.347222	0	0	0
Zoanthids	0	0	0	0	0	0	0	2.77778	0	6.59722	0	0	0	0	0	1.38889	0	0	0	0	0	0	0	0	0	0	0	0	0	0	7.98611	0	0	0	28.125	1.38889	6.94444	23.9583	0.347222	0
Other Live	0.347222	0	0	4.86111	0	0	0.347222	0	0	0	0	0	0	0	0	0	0	0	0.694444	0	0	0.347222	0	0	0	0	0	0	0	0	0	0	0.347222	1.38889	0	0	0	0	0	0
Macroalgae	30.9028	34.0278	34.0278	33.6806	30.5556	30.5556	27.4306	38.1944	35.4167	32.2917	34.375	9.375	34.375	32.9861	27.7778	29.5139	29.8611	13.5417	11.8056	21.1806	17.0139	14.2361	14.9306	20.4861	18.4028	24.6528	34.0278	19.7917	19.4444	30.2083	7.63889	10.7639	12.5	27.4306	11.1111	10.0694	8.68056	4.86111	24.3056	12.1528
Turf	13.1944	11.4583	11.4583	16.3194	12.1528	24.6528	21.1806	12.8472	12.8472	15.2778	0	24.6528	17.3611	4.86111	13.8889	9.375	5.90278	16.6667	7.63889	9.375	14.2361	31.25	18.75	10.0694	17.3611	13.5417	9.375	9.72222	11.4583	16.6667	6.94444	10.4167	8.33333	1.73611	4.86111	28.4722	24.6528	6.59722	12.1528	15.625
Crustose Coralline Algae	2.77778	3.81944	4.51389	2.08333	7.29167	5.55556	38.8889	15.625	32.9861	21.1806	0.694444	10.7639	0	0.694444	10.7639	16.3194	11.8056	17.0139	14.9306	10.7639	7.98611	6.94444	6.94444	15.9722	16.6667	24.6528	20.1389	9.72222	19.0972	6.59722	22.2222	33.3333	26.7361	23.6111	31.9444	37.8472	30.5556	36.1111	22.9167	12.8472
Erect Calcareous Algae	1.04167	2.77778	2.77778	4.16667	2.43056	2.43056	0	1.04167	1.38889	4.16667	0	2.08333	0.347222	0	1.73611	1.73611	0.694444	0.347222	0.347222	2.08333	4.16667	1.73611	3.81944	0.694444	1.04167	3.125	5.20833	6.94444	6.59722	3.81944	2.77778	3.81944	3.125	2.08333	0	1.38889	0	0	0.347222	1.04167
Chrysophyceae	0	0	0	0	0	0	0	0	0	0	0	0	0	0	0	0	0	0	0	0	0	0	0	0	0	0	0	0	0	0	0	0	0	0	0	0	0	0	0	0
Cyanobacteria	1.73611	1.04167	2.77778	3.81944	2.43056	13.8889	3.81944	4.16667	3.47222	9.72222	0.347222	2.08333	2.43056	1.04167	0	3.47222	3.125	9.02778	2.08333	5.90278	4.16667	2.08333	3.125	1.04167	0	2.43056	5.20833	2.08333	3.81944	3.81944	1.38889	1.38889	0	0	1.38889	2.77778	4.16667	2.43056	10.4167	11.4583
Pavement	0	10.4167	3.47222	6.94444	0	24.3056	0	3.47222	0	0	13.8889	41.6667	0	0	38.1944	20.8333	0	0	45.1389	13.8889	3.47222	48.6111	13.8889	0	0	13.8889	3.47222	0	0	0	6.94444	0	6.94444	0	0	34.7222	17.3611	6.94444	6.94444	31.25
Rubble	12.6366	65.9722	0	13.8889	20.8333	41.6667	3.47222	0	0	3.47222	0	13.8889	6.94444	0	20.8333	3.47222	0	17.3611	0	0	121.528	152.778	375	152.778	10.4167	0	0	3.47222	13.8889	31.25	0	10.4167	0	0	0	0	0	0	10.4167	0
Sand	18.1011	145.833	184.028	180.556	90.2778	79.8611	3.47222	31.25	10.4167	6.94444	423.611	326.389	135.417	190.972	62.5	107.639	166.667	20.8333	48.6111	27.7778	107.639	69.4444	20.8333	295.139	100.694	17.3611	6.94444	13.8889	38.1944	34.7222	17.3611	27.7778	10.4167	34.7222	0	3.47222	6.94444	0	41.6667	10.4167
Diadema Density	2	3	0	0	1	0.25	0.05	0.2	0.1	0.15	0.1	0.05	0	0	0.15	0.2	0.35	0.15	0.2	0.05	0.95	0.45	0.4	0.55	0	0.2	0.45	0.3	0.55	0.05	0.1	0.2	0	0.05	0.15	0.1	0.2	0.15	0.25	0.45
Hard Coral Recruitment Density	3.33333	0.666667	0	0	0	0.333333	0	0	0.333333	0	0	1.66667	0.666667	0.333333	0	1.33333	1	2	1.33333	0.333333	0.666667	0.666667	0.333333	3	0.666667	0.666667	0	0	0.666667	0	4	4	2.33333	2	1.33333	0.333333	0.666667	0.333333	2.66667	0.333333
Rugosity Ratio Index	1.368	1.566	1.858	1.728	1.43	1.614	1.977	1.87	1.882	1.54	1.538	1.627	1.554	1.554	1.303	1.826	1.824	1.73	1.654	2.008	1.566	1.202	1.307	1.211	1.505	1.675	1.472	1.667	1.67	1.215	1.275	1.34	1.48	1.372	1.534	1.432	1.603	1.46	1.127	1.35
Percent of Diseased Corals	0	10	66.6667	100	8.33333	0	0	20	0	88.8889	0	100	0	0	15.3846	0	0	0	0	0	0	100	0	50	0	0	0	0	0	0	0	0	20	0	93.75	0	0	0	0	0
# Visitors	7	7	7	7	7	3.85714	3.85714	3.85714	3.85714	3.85714	49.7143	49.7143	49.7143	49.7143	49.7143	1.71429	1.71429	1.71429	1.71429	1.71429	3	3	3	3	3	2.28571	2.28571	2.28571	2.28571	2.28571	0.714286	0.714286	0.714286	0.714286	0.714286	0.285714	0.285714	0.285714	0.285714	0.285714
S	2	2	1.66667	1	1.33333	1	0.666667	2.5	1.16667	1	1.83333	2	3	3.83333	3	3.33333	2.33333	4.16667	2.83333	4.33333	2.83333	1	1	0.5	1.33333	2.83333	2.16667	4.83333	2.5	3.66667	5.5	4.5	4.16667	3.83333	2.33333	2	2.8	1.16667	3.5	4
H'(loge)	0.499715	0.521642	0.471594	0.193517	0.226734	0.0997116	0.152759	0.690316	0.189486	0.115525	0.401848	0.628528	0.845289	1.11394	0.791103	0.959615	0.612491	1.08621	0.645049	1.06565	0.704954	0.0804296	0.148846	0.111375	0.147903	0.639045	0.610086	1.20433	0.687687	0.907206	1.44078	1.16122	1.16895	1.07583	0.72879	0.548574	0.649623	0.0298075	1.08563	1.15773
J'	0.660615	0.697813	0.883076	0.837557	0.981323	0.863121	0.834282	0.840328	0.820112	1	0.800639	0.896782	0.80323	0.882498	0.80242	0.826133	0.734904	0.814926	0.657708	0.745498	0.806869	0.696212	0.644219	0.964079	0.640137	0.737168	0.884056	0.746811	0.888618	0.747137	0.919823	0.824207	0.82834	0.886101	0.892794	0.860093	0.846513	0.258019	0.899819	0.857374
Δ*	39.21	62.1266	36.4525	27.7778	27.7778	11.1111	10.8543	40.9976	16.6667	2.77778	43.6583	64.3519	62.7678	71.6732	55.64	70.7503	66.3901	51.992	58.4467	66.1894	41.5865	13.8889	27.7778	2.77778	19.4444	53.1662	39.3131	64.6715	49.3324	63.4383	71.1071	64.0884	72.0394	60.5518	65.4008	31.3576	34.3434	13.8889	76.1892	71.325
Λ+	29.2695	51.4403	164.609	0	0	0	41.1523	124.537	0	0	41.1523	41.1523	201.646	373.357	115.226	155.144	102.881	272.942	248.2	331.687	177.16	0	0	0	0	224.028	270.628	282.428	198.045	279.064	367.576	197.448	362.5	321.862	27.0062	183.245	100.556	0	136.265	273.611
Locality	A	A	A	A	A	B	B	B	B	B	C	C	C	C	C	D	D	D	D	D	E	E	E	E	E	F	F	F	F	F	G	G	G	G	G	H	H	H	H	H
Distance	Nearshore	Nearshore	Nearshore	Nearshore	Nearshore	Nearshore	Nearshore	Nearshore	Nearshore	Nearshore	Nearshore	Nearshore	Nearshore	Nearshore	Nearshore	Nearshore	Nearshore	Nearshore	Nearshore	Nearshore	Offshore	Offshore	Offshore	Offshore	Offshore	Offshore	Offshore	Offshore	Offshore	Offshore	Offshore	Offshore	Offshore	Offshore	Offshore	Offshore	Offshore	Offshore	Offshore	Offshore
Recreation Index	High	High	High	High	High	Moderate	Moderate	Moderate	Moderate	Moderate	Very High	Very High	Very High	Very High	Very High	Low	Low	Low	Low	Low	Moderate	Moderate	Moderate	Moderate	Moderate	Moderate	Moderate	Moderate	Moderate	Moderate	Very Low	Very Low	Very Low	Very Low	Very Low	Very Low	Very Low	Very Low	Very Low	Very Low
Topographic Complexity	M	MH	H	MH	M	MH	H	H	H	MH	MH	MH	MH	MH	M	H	H	MH	MH	H	MH	L	M	L	MH	MH	M	MH	MH	L	M	M	M	M	MH	M	MH	M	L	M
Diadema Index	Good	Very Good	Critial	Critical	Fair	Poor	Critical	Critical	Critical	Critical	Critical	Critical	Critical	Critical	Critical	Poor	Poor	Critical	Critical	Critical	Fair	Fair	Poor	Fair	Good	Critical	Fair	Poor	Fair	Critical	Critical	Critical	Critical	Critical	Critical	Critical	Critical	Critical	Critical	Critical

## Sheet: CRRI raw values
		Coral Index									T Spceies Index									Algal Index
	GLOBAL CRRI	Coral Index	Live Coral Cover	Av. Coral cover	Hard Coral Recruitment Density	Av. Recruitment	Bleaching	Ave Bleaching	S	Ave S	T Spceies Index	Apal	Av apal	Acer	Av acer	Av onn	Av. O nn	Ofav	Av O fav		Macroalgae	Av Macro	Turf	Av turf	Crustose Calcareous Algae	Av CCA	Halimeda	Av Halimeda	Dictyota	Av Dictyota	Lobophora	Av Lobo	Ramicrusta/Peyssonnelia	Av Rami/Pey
A1	5.40812	6.55174	18.75	23.5069	3.33333	0.866667	0	0.2	2	1.63333	0.525	0	0	0	0.05	0	1.15	0	0.9	9.14762	30.9028	32.6389	13.1944	12.9167	2.77778	4.02778	3	1.28333	8.5	11.5333	2	0.65	0.333333	0.983333
A1			18.75		3.33333		0		2			0		0		0		0			30.9028		13.1944		2.77778		3		8.5		2		0.333333
A2			24.6528		0.666667		0.666667		2			0		0.166667		0		1.5			34.0278		11.4583		3.81944		1		12.1667		0.833333		1
A2			24.6528		0.666667		0.666667		2			0		0.166667		0		1.5			34.0278		11.4583		3.81944		1		12.1667		0.833333		1
A3			25.6944		0		0		1.66667			0		0		3.5		4.5			34.0278		11.4583		4.51389		0.833333		14.5		0		0.166667
A3			24.6528		0.666667		0.666667		2			0		0.166667		0		1.5			34.0278		11.4583		3.81944		1		12.1667		0.833333		1
A4			14.9306		0		0		1			0		0		0		0			33.6806		16.3194		2.08333		1		10.5		0		1
A4			14.9306		0		0		1			0		0		0		0			33.6806		16.3194		2.08333		1		10.5		0		1
A5			34.0278		0		0		1.33333			0		0		4		0			30.5556		12.1528		7.29167		0.5		13.1667		0		2
A5			34.0278		0		0		1.33333			0		0		4		0			30.5556		12.1528		7.29167		0.5		13.1667		0		2
B1	5.48297	3.34375	8.33333	11.875	0.333333	0.2	0	0	1	1.3	0.15	0	0.5	0	0.1	0	0	0	0	12.9552	30.5556	33.4028	24.6528	16.875	5.55556	25.2083	2	1.33333	8.66667	11.8333	0	0	0	2.03333
B1			8.33333		0.333333		0		1			0		0		0		0			30.5556		24.6528		5.55556		2		8.66667		0		0
B2			7.63889		0		0		0.666667			0		0.5		0		0			27.4306		21.1806		38.8889		1.33333		12.1667		0		0
B2			7.63889		0		0		0.666667			0		0.5		0		0			27.4306		21.1806		38.8889		1.33333		12.1667		0		0
B3			21.875		0		0		2.5			0.833333		0		0		0			38.1944		12.8472		15.625		1		13.3333		0		1.83333
B3			21.875		0		0		2.5			0.833333		0		0		0			38.1944		12.8472		15.625		1		13.3333		0		1.83333
B4			10.7639		0.333333		0		1.16667			0.833333		0		0		0			35.4167		12.8472		32.9861		1.16667		12.5		0		4.16667
B4			10.7639		0.333333		0		1.16667			0.833333		0		0		0			35.4167		12.8472		32.9861		1.16667		12.5		0		4.16667
B4			10.7639		0.333333		0		1.16667			0.833333		0		0		0			35.4167		12.8472		32.9861		1.16667		12.5		0		4.16667
B4			10.7639		0.333333		0		1.16667			0.833333		0		0		0			35.4167		12.8472		32.9861		1.16667		12.5		0		4.16667
C1	5.67808	7.81319	20.8333	27.9861	0	0.533333	0	0	1.83333	2.73333	1	0	0	0	0.6	5	3.4	0	0	8.22103	34.375	27.7778	0	12.1528	0.694444	4.58333	0	0.6	16.5	12.1333	0	0	0	0.3
C1			20.8333		0		0		1.83333			0		0		5		0			34.375		0		0.694444		0		16.5		0		0
C2			12.8472		1.66667		0		2			0		0		1.5		0			9.375		24.6528		10.7639		0		2.66667		0		0.5
C2			12.8472		1.66667		0		2			0		0		1.5		0			9.375		24.6528		10.7639		0		2.66667		0		0.5
C3			31.25		0.666667		0		3			0		0		0		0			34.375		17.3611		0		2.66667		15.6667		0		0
C3			31.25		0.666667		0		3			0		0		0		0			34.375		17.3611		0		2.66667		15.6667		0		0
C4			41.3194		0.333333		0		3.83333			0		0		6		0			32.9861		4.86111		0.694444		0		14.3333		0		0.333333
C4			41.3194		0.333333		0		3.83333			0		0		6		0			32.9861		4.86111		0.694444		0		14.3333		0		0.333333
C5			33.6806		0		0		3			0		3		4.5		0			27.7778		13.8889		10.7639		0.333333		11.5		0		0.666667
C5			33.6806		0		0		3			0		3		4.5		0			27.7778		13.8889		10.7639		0.333333		11.5		0		0.666667
D1	6.87781	10.9493	25	39.0972	1.33333	1.2	0	0.1	3.33333	3.4	1.45	0	1.13333	0	0	0	3.33333	0	1.33333	8.23413	29.5139	21.1806	9.375	9.79167	16.3194	14.1667	0	0.866667	8.66667	6.93333	0	0.0333333	6.5	4.66667
D1			25		1.33333		0		3.33333			0		0		0		0			29.5139		9.375		16.3194		0		8.66667		0		6.5
D2			31.9444		1		0		2.33333			0		0		3.83333		3.66667			29.8611		5.90278		11.8056		0.333333		9.5		0		3.83333
D2			31.9444		1		0		2.33333			0		0		3.83333		3.66667			29.8611		5.90278		11.8056		0.333333		9.5		0		3.83333
D3			39.5833		2		0		4.16667			0		0		2		0.333333			13.5417		16.6667		17.0139		1.5		5.5		0		3.33333
D3			39.5833		2		0		4.16667			0		0		2		0.333333			13.5417		16.6667		17.0139		1.5		5.5		0		3.33333
D4			53.125		1.33333		0.333333		2.83333			5.66667		0		6.83333		0			11.8056		7.63889		14.9306		0.666667		5.16667		0		5.16667
D4			53.125		1.33333		0.333333		2.83333			5.66667		0		6.83333		0			11.8056		7.63889		14.9306		0.666667		5.16667		0		5.16667
D5			45.8333		0.333333		0.166667		4.33333			0		0		4		2.66667			21.1806		9.375		10.7639		1.83333		5.83333		0.166667		4.5
D5			45.8333		0.333333		0.166667		4.33333			0		0		4		2.66667			21.1806		9.375		10.7639		1.83333		5.83333		0.166667		4.5
E1	4.86104	5.60694	29.1667	19.8611	0.666667	1.06667	0.833333	0.166667	2.83333	1.33333	1.08333	0	3.03333	4	0.8	2	0.5	0	0	7.89286	17.0139	17.0139	14.2361	18.3333	7.98611	10.9028	0	0.1	7.83333	6.6	0	0	2.5	2.3
E1			29.1667		0.666667		0.833333		2.83333			0		4		2		0			17.0139		14.2361		7.98611		0		7.83333		0		2.5
E2			16.3194		0.666667		0		1			0		0		0		0			14.2361		31.25		6.94444		0.5		5.5		0		0.666667
E2			16.3194		0.666667		0		1			0		0		0		0			14.2361		31.25		6.94444		0.5		5.5		0		0.666667
E3			11.4583		0.333333		0		1			0		0		0		0			14.9306		18.75		6.94444		0		5.16667		0		2.16667
E3			11.4583		0.333333		0		1			0		0		0		0			14.9306		18.75		6.94444		0		5.16667		0		2.16667
E4			6.94444		3		0		0.5			0		0		0		0			20.4861		10.0694		15.9722		0		8.33333		0		3.33333
E4			6.94444		3		0		0.5			0		0		0		0			20.4861		10.0694		15.9722		0		8.33333		0		3.33333
E5			35.4167		0.666667		0		1.33333			15.1667		0		0.5		0			18.4028		17.3611		16.6667		0		6.16667		0		2.83333
E5			35.4167		0.666667		0		1.33333			15.1667		0		0.5		0			18.4028		17.3611		16.6667		0		6.16667		0		2.83333
F1	6.67159	9.34653	28.4722	33.8194	0.666667	0.266667	0.333333	0.1	2.83333	3.2	0.741667	0	0	0	0	1.33333	2	0	0.966667	9.92659	24.6528	25.625	13.5417	12.1528	24.6528	16.0417	0	0.566667	11	11.2333	0	0	5.16667	3.86667
F1			28.4722		0.666667		0.333333		2.83333			0		0		1.33333		0			24.6528		13.5417		24.6528		0		11		0		5.16667
F2			25		0		0.166667		2.16667			0		0		1.33333		1			34.0278		9.375		20.1389		0		14.5		0		4
F2			25		0		0.166667		2.16667			0		0		1.33333		1			34.0278		9.375		20.1389		0		14.5		0		4
F3			49.6528		0		0		4.83333			0		0		0		2.33333			19.7917		9.72222		9.72222		0.5		8.5		0		4
F3			49.6528		0		0		4.83333			0		0		0		2.33333			19.7917		9.72222		9.72222		0.5		8.5		0		4
F4			34.0278		0.666667		0		2.5			0		0		6.83333		0			19.4444		11.4583		19.0972		0.666667		8.66667		0		3.5
F4			34.0278		0.666667		0		2.5			0		0		6.83333		0			19.4444		11.4583		19.0972		0.666667		8.66667		0		3.5
F5			31.9444		0		0		3.66667			0		0		0.5		1.5			30.2083		16.6667		6.59722		1.66667		13.5		0		2.66667
F5			31.9444		0		0		3.66667			0		0		0.5		1.5			30.2083		16.6667		6.59722		1.66667		13.5		0		2.66667
G1	6.79299	11.3528	48.6111	38.6111	4	2.73333	0	0	5.5	4.06667	0.266667	0	1	0	0.0666667	0	0	0	0	8.75952	7.63889	13.8889	6.94444	6.45833	22.2222	27.5694	0	0	3.5	5.2	0	1.2	8.83333	7
G1			48.6111		4		0		5.5			0		0		0		0			7.63889		6.94444		22.2222		0		3.5		0		8.83333
G2			36.4583		4		0		4.5			0		0		0		0			10.7639		10.4167		33.3333		0		4.16667		0		10.8333
G2			36.4583		4		0		4.5			0		0		0		0			10.7639		10.4167		33.3333		0		4.16667		0		10.8333
G3			47.2222		2.33333		0		4.16667			2.5		0		0		0			12.5		8.33333		26.7361		0		5.33333		0.5		5.16667
G3			47.2222		2.33333		0		4.16667			2.5		0		0		0			12.5		8.33333		26.7361		0		5.33333		0.5		5.16667
G4			38.1944		2		0		3.83333			1.5		0.333333		0		0			27.4306		1.73611		23.6111		0		7.66667		5.5		8.66667
G4			38.1944		2		0		3.83333			1.5		0.333333		0		0			27.4306		1.73611		23.6111		0		7.66667		5.5		8.66667
G5			22.5694		1.33333		0		2.33333			1		0		0		0			11.1111		4.86111		31.9444		0		5.33333		0		1.5
G5			22.5694		1.33333		0		2.33333			1		0		0		0			11.1111		4.86111		31.9444		0		5.33333		0		1.5
H1	5.80364	7.30458	14.2361	25.625	0.333333	0.866667	0	0.0333333	2	2.69333	0.325	0	1.3	0	0	0	0	0	0	9.78135	10.0694	12.0139	28.4722	17.5	37.8472	28.0556	4	1.56667	3.5	3.86667	0	0.0333333	7.16667	5.43333
H1			14.2361		0.333333		0		2			0		0		0		0			10.0694		28.4722		37.8472		4		3.5		0		7.16667
H2			22.2222		0.666667		0.166667		2.8			0		0		0		0			8.68056		24.6528		30.5556		2.83333		3.5		0		6.33333
H2			22.2222		0.666667		0.166667		2.8			0		0		0		0			8.68056		24.6528		30.5556		2.83333		3.5		0		6.33333
H3			25.3472		0.333333		0		1.16667			5		0		0		0			4.86111		6.59722		36.1111		0.166667		0.666667		0		7.33333
H3			25.3472		0.333333		0		1.16667			5		0		0		0			4.86111		6.59722		36.1111		0.166667		0.666667		0		7.33333
H4			23.6111		2.66667		0		3.5			0		0		0		0			24.3056		12.1528		22.9167		0.333333		7		0.166667		2.66667
H4			23.6111		2.66667		0		3.5			0		0		0		0			24.3056		12.1528		22.9167		0.333333		7		0.166667		2.66667
H5			42.7083		0.333333		0		4			1.5		0		0		0			12.1528		15.625		12.8472		0.5		4.66667		0		3.66667
H5			42.7083		0.333333		0		4			1.5		0		0		0			12.1528		15.625		12.8472		0.5		4.66667		0		3.66667

## Sheet: CRRI Classified Site Averaged
		Coral Index									T Spceies Index									Algal Index
	GLOBAL CRRI	Coral Index	Live Coral Cover	Classified Coral cover	Hard Coral Recruitment Density	Classified Recruitment	Bleaching	Classified Bleaching	S	Classified S	T Spceies Index	Apal	Classified A. palmata	Acer	Classified A. cervicornis	Av onn	Classified O. annularis	Ofav	Classified O. faveolata	Algal Index	Macroalgae	Classified Macro	Turf	Classified Turf	Crustose Calcareous Algae	Classified CCA	Halimeda	Classified Halimeda	Dictyota	Classified Dictyota	Lobophora	Classified Lobo	Ramicrusta/Peyssonnelia	Classified Rami/Pey
A1	2.4881	2.75	18.75	4	3.33333	1	0	5	2	1	1	0	1	0	1	0	1	0	1	3.71429	30.9028	3	13.1944	4	2.77778	1	3	5	8.5	3	2	5	0.333333	5
A1			18.75		3.33333		0		2			0		0		0		0			30.9028		13.1944		2.77778		3		8.5		2		0.333333
A2			24.6528		0.666667		0.666667		2			0		0.166667		0		1.5			34.0278		11.4583		3.81944		1		12.1667		0.833333		1
A2			24.6528		0.666667		0.666667		2			0		0.166667		0		1.5			34.0278		11.4583		3.81944		1		12.1667		0.833333		1
A3			25.6944		0		0		1.66667			0		0		3.5		4.5			34.0278		11.4583		4.51389		0.833333		14.5		0		0.166667
A3			24.6528		0.666667		0.666667		2			0		0.166667		0		1.5			34.0278		11.4583		3.81944		1		12.1667		0.833333		1
A4			14.9306		0		0		1			0		0		0		0			33.6806		16.3194		2.08333		1		10.5		0		1
A4			14.9306		0		0		1			0		0		0		0			33.6806		16.3194		2.08333		1		10.5		0		1
A5			34.0278		0		0		1.33333			0		0		4		0			30.5556		12.1528		7.29167		0.5		13.1667		0		2
A5			34.0278		0		0		1.33333			0		0		4		0			30.5556		12.1528		7.29167		0.5		13.1667		0		2
B1	2.54762	2.5	8.33333	3	0.333333	1	0	5	1	1	1	0	1	0	1	0	1	0	1	4.14286	30.5556	3	24.6528	4	5.55556	4	2	5	8.66667	3	0	5	0	5
B1			8.33333		0.333333		0		1			0		0		0		0			30.5556		24.6528		5.55556		2		8.66667		0		0
B2			7.63889		0		0		0.666667			0		0.5		0		0			27.4306		21.1806		38.8889		1.33333		12.1667		0		0
B2			7.63889		0		0		0.666667			0		0.5		0		0			27.4306		21.1806		38.8889		1.33333		12.1667		0		0
B3			21.875		0		0		2.5			0.833333		0		0		0			38.1944		12.8472		15.625		1		13.3333		0		1.83333
B3			21.875		0		0		2.5			0.833333		0		0		0			38.1944		12.8472		15.625		1		13.3333		0		1.83333
B4			10.7639		0.333333		0		1.16667			0.833333		0		0		0			35.4167		12.8472		32.9861		1.16667		12.5		0		4.16667
B4			10.7639		0.333333		0		1.16667			0.833333		0		0		0			35.4167		12.8472		32.9861		1.16667		12.5		0		4.16667
B4			10.7639		0.333333		0		1.16667			0.833333		0		0		0			35.4167		12.8472		32.9861		1.16667		12.5		0		4.16667
B4			10.7639		0.333333		0		1.16667			0.833333		0		0		0			35.4167		12.8472		32.9861		1.16667		12.5		0		4.16667
C1	2.57143	3	20.8333	4	0	1	0	5	1.83333	2	1	0	1	0	1	5	1	0	1	3.71429	34.375	3	0	4	0.694444	1	0	5	16.5	3	0	5	0	5
C1			20.8333		0		0		1.83333			0		0		5		0			34.375		0		0.694444		0		16.5		0		0
C2			12.8472		1.66667		0		2			0		0		1.5		0			9.375		24.6528		10.7639		0		2.66667		0		0.5
C2			12.8472		1.66667		0		2			0		0		1.5		0			9.375		24.6528		10.7639		0		2.66667		0		0.5
C3			31.25		0.666667		0		3			0		0		0		0			34.375		17.3611		0		2.66667		15.6667		0		0
C3			31.25		0.666667		0		3			0		0		0		0			34.375		17.3611		0		2.66667		15.6667		0		0
C4			41.3194		0.333333		0		3.83333			0		0		6		0			32.9861		4.86111		0.694444		0		14.3333		0		0.333333
C4			41.3194		0.333333		0		3.83333			0		0		6		0			32.9861		4.86111		0.694444		0		14.3333		0		0.333333
C5			33.6806		0		0		3			0		3		4.5		0			27.7778		13.8889		10.7639		0.333333		11.5		0		0.666667
C5			33.6806		0		0		3			0		3		4.5		0			27.7778		13.8889		10.7639		0.333333		11.5		0		0.666667
D1	2.92857	3.5	25	5	1.33333	1	0	5	3.33333	3	1	0	1	0	1	0	1	0	1	4.28571	29.5139	3	9.375	5	16.3194	3	0	5	8.66667	4	0	5	6.5	5
D1			25		1.33333		0		3.33333			0		0		0		0			29.5139		9.375		16.3194		0		8.66667		0		6.5
D2			31.9444		1		0		2.33333			0		0		3.83333		3.66667			29.8611		5.90278		11.8056		0.333333		9.5		0		3.83333
D2			31.9444		1		0		2.33333			0		0		3.83333		3.66667			29.8611		5.90278		11.8056		0.333333		9.5		0		3.83333
D3			39.5833		2		0		4.16667			0		0		2		0.333333			13.5417		16.6667		17.0139		1.5		5.5		0		3.33333
D3			39.5833		2		0		4.16667			0		0		2		0.333333			13.5417		16.6667		17.0139		1.5		5.5		0		3.33333
D4			53.125		1.33333		0.333333		2.83333			5.66667		0		6.83333		0			11.8056		7.63889		14.9306		0.666667		5.16667		0		5.16667
D4			53.125		1.33333		0.333333		2.83333			5.66667		0		6.83333		0			11.8056		7.63889		14.9306		0.666667		5.16667		0		5.16667
D5			45.8333		0.333333		0.166667		4.33333			0		0		4		2.66667			21.1806		9.375		10.7639		1.83333		5.83333		0.166667		4.5
D5			45.8333		0.333333		0.166667		4.33333			0		0		4		2.66667			21.1806		9.375		10.7639		1.83333		5.83333		0.166667		4.5
E1	2.67857	2.5	29.1667	3	0.666667	1	0.833333	5	2.83333	1	1.25	0	2	4	1	2	1	0	1	4.28571	17.0139	4	14.2361	4	7.98611	3	0	5	7.83333	4	0	5	2.5	5
E1			29.1667		0.666667		0.833333		2.83333			0		4		2		0			17.0139		14.2361		7.98611		0		7.83333		0		2.5
E2			16.3194		0.666667		0		1			0		0		0		0			14.2361		31.25		6.94444		0.5		5.5		0		0.666667
E2			16.3194		0.666667		0		1			0		0		0		0			14.2361		31.25		6.94444		0.5		5.5		0		0.666667
E3			11.4583		0.333333		0		1			0		0		0		0			14.9306		18.75		6.94444		0		5.16667		0		2.16667
E3			11.4583		0.333333		0		1			0		0		0		0			14.9306		18.75		6.94444		0		5.16667		0		2.16667
E4			6.94444		3		0		0.5			0		0		0		0			20.4861		10.0694		15.9722		0		8.33333		0		3.33333
E4			6.94444		3		0		0.5			0		0		0		0			20.4861		10.0694		15.9722		0		8.33333		0		3.33333
E5			35.4167		0.666667		0		1.33333			15.1667		0		0.5		0			18.4028		17.3611		16.6667		0		6.16667		0		2.83333
E5			35.4167		0.666667		0		1.33333			15.1667		0		0.5		0			18.4028		17.3611		16.6667		0		6.16667		0		2.83333
F1	2.66667	3	28.4722	4	0.666667	1	0.333333	5	2.83333	2	1	0	1	0	1	1.33333	1	0	1	4	24.6528	3	13.5417	4	24.6528	3	0	5	11	3	0	5	5.16667	5
F1			28.4722		0.666667		0.333333		2.83333			0		0		1.33333		0			24.6528		13.5417		24.6528		0		11		0		5.16667
F2			25		0		0.166667		2.16667			0		0		1.33333		1			34.0278		9.375		20.1389		0		14.5		0		4
F2			25		0		0.166667		2.16667			0		0		1.33333		1			34.0278		9.375		20.1389		0		14.5		0		4
F3			49.6528		0		0		4.83333			0		0		0		2.33333			19.7917		9.72222		9.72222		0.5		8.5		0		4
F3			49.6528		0		0		4.83333			0		0		0		2.33333			19.7917		9.72222		9.72222		0.5		8.5		0		4
F4			34.0278		0.666667		0		2.5			0		0		6.83333		0			19.4444		11.4583		19.0972		0.666667		8.66667		0		3.5
F4			34.0278		0.666667		0		2.5			0		0		6.83333		0			19.4444		11.4583		19.0972		0.666667		8.66667		0		3.5
F5			31.9444		0		0		3.66667			0		0		0.5		1.5			30.2083		16.6667		6.59722		1.66667		13.5		0		2.66667
F5			31.9444		0		0		3.66667			0		0		0.5		1.5			30.2083		16.6667		6.59722		1.66667		13.5		0		2.66667
G1	2.80952	3	48.6111	4	4	1	0	5	5.5	2	1	0	1	0	1	0	1	0	1	4.42857	7.63889	4	6.94444	5	22.2222	4	0	5	3.5	4	0	5	8.83333	4
G1			48.6111		4		0		5.5			0		0		0		0			7.63889		6.94444		22.2222		0		3.5		0		8.83333
G2			36.4583		4		0		4.5			0		0		0		0			10.7639		10.4167		33.3333		0		4.16667		0		10.8333
G2			36.4583		4		0		4.5			0		0		0		0			10.7639		10.4167		33.3333		0		4.16667		0		10.8333
G3			47.2222		2.33333		0		4.16667			2.5		0		0		0			12.5		8.33333		26.7361		0		5.33333		0.5		5.16667
G3			47.2222		2.33333		0		4.16667			2.5		0		0		0			12.5		8.33333		26.7361		0		5.33333		0.5		5.16667
G4			38.1944		2		0		3.83333			1.5		0.333333		0		0			27.4306		1.73611		23.6111		0		7.66667		5.5		8.66667
G4			38.1944		2		0		3.83333			1.5		0.333333		0		0			27.4306		1.73611		23.6111		0		7.66667		5.5		8.66667
G5			22.5694		1.33333		0		2.33333			1		0		0		0			11.1111		4.86111		31.9444		0		5.33333		0		1.5
G5			22.5694		1.33333		0		2.33333			1		0		0		0			11.1111		4.86111		31.9444		0		5.33333		0		1.5
H1	2.72619	2.75	14.2361	4	0.333333	1	0	5	2	1	1	0	1	0	1	0	1	0	1	4.42857	10.0694	4	28.4722	4	37.8472	4	4	5	3.5	5	0	5	7.16667	4
H1			14.2361		0.333333		0		2			0		0		0		0			10.0694		28.4722		37.8472		4		3.5		0		7.16667
H2			22.2222		0.666667		0.166667		2.8			0		0		0		0			8.68056		24.6528		30.5556		2.83333		3.5		0		6.33333
H2			22.2222		0.666667		0.166667		2.8			0		0		0		0			8.68056		24.6528		30.5556		2.83333		3.5		0		6.33333
H3			25.3472		0.333333		0		1.16667			5		0		0		0			4.86111		6.59722		36.1111		0.166667		0.666667		0		7.33333
H3			25.3472		0.333333		0		1.16667			5		0		0		0			4.86111		6.59722		36.1111		0.166667		0.666667		0		7.33333
H4			23.6111		2.66667		0		3.5			0		0		0		0			24.3056		12.1528		22.9167		0.333333		7		0.166667		2.66667
H4			23.6111		2.66667		0		3.5			0		0		0		0			24.3056		12.1528		22.9167		0.333333		7		0.166667		2.66667
H5			42.7083		0.333333		0		4			1.5		0		0		0			12.1528		15.625		12.8472		0.5		4.66667		0		3.66667
H5			42.7083		0.333333		0		4			1.5		0		0		0			12.1528		15.625		12.8472		0.5		4.66667		0		3.66667

## Sheet: CRRI Classified Transect
Different Indexes:		Coral Index									T Spceies Index									Algal Index
Transects	GLOBAL CRRI	Coral Index	Live Coral Cover	Classified Coral Cover	Hard Coral Recruitment Density	Classified Hard Coral Recruitment Density	Bleaching	Classified Bleaching	S	Classified S	T Spceies Index	Apal	Classified Apal	Acer	Classified Acer	Oann	Classified Oann	Ofav	Classified Ofav	Algal Index	Macroalgae	Classified Mac	Turf	Classified Turf	Crustose Calcareous Algae	Classified CCA	Halimeda	Classified Halimeda	Dictyota	Classified Dict	Lobophora	Classified Lobo	Ramicrusta/Peyssonnelia	Classified Rami-Pey
A1	2.53571	2.75	18.75	3	3.33333	2	0	5	2	1	1	0	1	0	1	0	1	0	1	3.85714	30.9028	3	13.1944	4	2.77778	1	3	5	8.5	4	2	5	0.333333	5
A1	2.53571	2.75	18.75	3	3.33333	2	0	5	2	1	1	0	1	0	1	0	1	0	1	3.85714	30.9028	3	13.1944	4	2.77778	1	3	5	8.5	4	2	5	0.333333	5
A2	2.4881	2.75	24.6528	4	0.666667	1	0.666667	5	2	1	1	0	1	0.166667	1	0	1	1.5	1	3.71429	34.0278	3	11.4583	4	3.81944	1	1	5	12.1667	3	0.833333	5	1	5
A2	2.4881	2.75	24.6528	4	0.666667	1	0.666667	5	2	1	1	0	1	0.166667	1	0	1	1.5	1	3.71429	34.0278	3	11.4583	4	3.81944	1	1	5	12.1667	3	0.833333	5	1	5
A3	2.4881	2.75	25.6944	4	0	1	0	5	1.66667	1	1	0	1	0	1	3.5	1	4.5	1	3.71429	34.0278	3	11.4583	4	4.51389	1	0.833333	5	14.5	3	0	5	0.166667	5
A3	2.4881	2.75	25.6944	4	0.666667	1	0	5	2	1	1	0	1	0.166667	1	0	1	1.5	1	3.71429	34.0278	3	11.4583	4	3.81944	1	1	5	12.1667	3	0.833333	5	1	5
A4	2.40476	2.5	14.9306	3	0	1	0	5	1	1	1	0	1	0	1	0	1	0	1	3.71429	33.6806	3	16.3194	4	2.08333	1	1	5	10.5	3	0	5	1	5
A4	2.40476	2.5	14.9306	3	0	1	0	5	1	1	1	0	1	0	1	0	1	0	1	3.71429	33.6806	3	16.3194	4	2.08333	1	1	5	10.5	3	0	5	1	5
A5	2.53571	2.75	34.0278	4	0	1	0	5	1.33333	1	1	0	1	0	1	4	1	0	1	3.85714	30.5556	3	12.1528	4	7.29167	2	0.5	5	13.1667	3	0	5	2	5
A5	2.53571	2.75	34.0278	4	0	1	0	5	1.33333	1	1	0	1	0	1	4	1	0	1	3.85714	30.5556	3	12.1528	4	7.29167	2	0.5	5	13.1667	3	0	5	2	5
B1	2.36905	2.25	8.33333	2	0.333333	1	0	5	1	1	1	0	1	0	1	0	1	0	1	3.85714	30.5556	3	24.6528	3	5.55556	2	2	5	8.66667	4	0	5	0	5
B1	2.36905	2.25	8.33333	2	0.333333	1	0	5	1	1	1	0	1	0	1	0	1	0	1	3.85714	30.5556	3	24.6528	3	5.55556	2	2	5	8.66667	4	0	5	0	5
B2	2.46429	2.25	7.63889	2	0	1	0	5	0.666667	1	1	0	1	0.5	1	0	1	0	1	4.14286	27.4306	3	21.1806	3	38.8889	5	1.33333	5	12.1667	3	0	5	0	5
B2	2.46429	2.25	7.63889	2	0	1	0	5	0.666667	1	1	0	1	0.5	1	0	1	0	1	4.14286	27.4306	3	21.1806	3	38.8889	5	1.33333	5	12.1667	3	0	5	0	5
B3	2.58333	2.75	21.875	4	0	1	0	5	2.5	1	1	0.833333	1	0	1	0	1	0	1	4	38.1944	3	12.8472	4	15.625	3	1	5	13.3333	3	0	5	1.83333	5
B3	2.58333	2.75	21.875	4	0	1	0	5	2.5	1	1	0.833333	1	0	1	0	1	0	1	4	38.1944	3	12.8472	4	15.625	3	1	5	13.3333	3	0	5	1.83333	5
B4	2.59524	2.5	10.7639	3	0.333333	1	0	5	1.16667	1	1	0.833333	1	0	1	0	1	0	1	4.28571	35.4167	3	12.8472	4	32.9861	5	1.16667	5	12.5	3	0	5	4.16667	5
B4	2.59524	2.5	10.7639	3	0.333333	1	0	5	1.16667	1	1	0.833333	1	0	1	0	1	0	1	4.28571	35.4167	3	12.8472	4	32.9861	5	1.16667	5	12.5	3	0	5	4.16667	5
B5	2.59524	2.5	10.7639	3	0.333333	1	0	5	1.16667	1	1	0.833333	1	0	1	0	1	0	1	4.28571	35.4167	3	12.8472	4	32.9861	5	1.16667	5	12.5	3	0	5	4.16667	5
B5	2.59524	2.5	10.7639	3	0.333333	1	0	5	1.16667	1	1	0.833333	1	0	1	0	1	0	1	4.28571	35.4167	3	12.8472	4	32.9861	5	1.16667	5	12.5	3	0	5	4.16667	5
D5	2.61905	2.75	20.8333	4	0	1	0	5	1.83333	1	1.25	0	1	0	1	5	2	0	1	3.85714	34.375	3	0	5	0.694444	1	0	5	16.5	3	0	5	0	5
C1	2.61905	2.75	20.8333	4	0	1	0	5	1.83333	1	1.25	0	1	0	1	5	2	0	1	3.85714	34.375	3	0	5	0.694444	1	0	5	16.5	3	0	5	0	5
C2	2.64286	2.5	12.8472	3	1.66667	1	0	5	2	1	1	0	1	0	1	1.5	1	0	1	4.42857	9.375	5	24.6528	3	10.7639	3	0	5	2.66667	5	0	5	0.5	5
C2	2.64286	2.5	12.8472	3	1.66667	1	0	5	2	1	1	0	1	0	1	1.5	1	0	1	4.42857	9.375	5	24.6528	3	10.7639	3	0	5	2.66667	5	0	5	0.5	5
C3	2.57143	3	31.25	4	0.666667	1	0	5	3	2	1	0	1	0	1	0	1	0	1	3.71429	34.375	3	17.3611	4	0	1	2.66667	5	15.6667	3	0	5	0	5
C3	2.57143	3	31.25	4	0.666667	1	0	5	3	2	1	0	1	0	1	0	1	0	1	3.71429	34.375	3	17.3611	4	0	1	2.66667	5	15.6667	3	0	5	0	5
C4	2.78571	3.25	41.3194	5	0.333333	1	0	5	3.83333	2	1.25	0	1	0	1	6	2	0	1	3.85714	32.9861	3	4.86111	5	0.694444	1	0	5	14.3333	3	0	5	0.333333	5
C4	2.78571	3.25	41.3194	5	0.333333	1	0	5	3.83333	2	1.25	0	1	0	1	6	2	0	1	3.85714	32.9861	3	4.86111	5	0.694444	1	0	5	14.3333	3	0	5	0.333333	5
C5	2.66667	3	33.6806	4	0	1	0	5	3	2	1	0	1	3	1	4.5	1	0	1	4	27.7778	3	13.8889	4	10.7639	3	0.333333	5	11.5	3	0	5	0.666667	5
C5	2.66667	3	33.6806	4	0	1	0	5	3	2	1	0	1	3	1	4.5	1	0	1	4	27.7778	3	13.8889	4	10.7639	3	0.333333	5	11.5	3	0	5	0.666667	5
D1	2.71429	3	25	4	1.33333	1	0	5	3.33333	2	1	0	1	0	1	0	1	0	1	4.14286	29.5139	3	9.375	5	16.3194	3	0	5	8.66667	4	0	5	6.5	4
D1	2.71429	3	25	4	1.33333	1	0	5	3.33333	2	1	0	1	0	1	0	1	0	1	4.14286	29.5139	3	9.375	5	16.3194	3	0	5	8.66667	4	0	5	6.5	4
D2	2.67857	2.75	31.9444	4	1	1	0	5	2.33333	1	1	0	1	0	1	3.83333	1	3.66667	1	4.28571	29.8611	3	5.90278	5	11.8056	3	0.333333	5	9.5	4	0	5	3.83333	5
D2	2.67857	2.75	31.9444	4	1	1	0	5	2.33333	1	1	0	1	0	1	3.83333	1	3.66667	1	4.28571	29.8611	3	5.90278	5	11.8056	3	0.333333	5	9.5	4	0	5	3.83333	5
D3	2.84524	3.25	39.5833	4	2	2	0	5	4.16667	2	1	0	1	0	1	2	1	0.333333	1	4.28571	13.5417	4	16.6667	4	17.0139	3	1.5	5	5.5	4	0	5	3.33333	5
D3	2.84524	3.25	39.5833	4	2	2	0	5	4.16667	2	1	0	1	0	1	2	1	0.333333	1	4.28571	13.5417	4	16.6667	4	17.0139	3	1.5	5	5.5	4	0	5	3.33333	5
D4	2.7619	3	53.125	5	1.33333	1	0.333333	5	2.83333	1	1	5.66667	1	0	1	6.83333	1	0	1	4.28571	11.8056	4	7.63889	5	14.9306	3	0.666667	5	5.16667	4	0	5	5.16667	4
D4	2.76	3	53.125	5	1.33333	1	0.333333	5	2.83333	1	1.25	5.66667	1	0	1	6.83333	2	0	1	4.28571	11.8056	4	7.63889	5	14.9306	3	0.666667	5	5.16667	4	0	5	5.16667	4
D5	2.84524	3.25	45.8333	5	0.333333	1	0.166667	5	4.33333	2	1	0	1	0	1	4	1	2.66667	1	4.28571	21.1806	3	9.375	5	10.7639	3	1.83333	5	5.83333	4	0.166667	5	4.5	5
D5	2.84524	3.25	45.8333	5	0.333333	1	0.166667	5	4.33333	2	1	0	1	0	1	4	1	2.66667	1	4.28571	21.1806	3	9.375	5	10.7639	3	1.83333	5	5.83333	4	0.166667	5	4.5	5
E1	2.66667	2.75	29.1667	4	0.666667	1	0.833333	5	2.83333	1	1.25	0	1	4	2	2	1	0	1	4	17.0139	4	14.2361	4	7.98611	1	0	5	7.83333	4	0	5	2.5	5
E1	2.66667	2.75	29.1667	4	0.666667	1	0.833333	5	2.83333	1	1.25	0	1	4	2	2	1	0	1	4	17.0139	4	14.2361	4	7.98611	1	0	5	7.83333	4	0	5	2.5	5
E2	2.5	2.5	16.3194	3	0.666667	1	0	5	1	1	1	0	1	0	1	0	1	0	1	4	14.2361	4	31.25	3	6.94444	2	0.5	5	5.5	4	0	5	0.666667	5
E2	2.5	2.5	16.3194	3	0.666667	1	0	5	1	1	1	0	1	0	1	0	1	0	1	4	14.2361	4	31.25	3	6.94444	2	0.5	5	5.5	4	0	5	0.666667	5
E3	2.54762	2.5	11.4583	3	0.333333	1	0	5	1	1	1	0	1	0	1	0	1	0	1	4.14286	14.9306	4	18.75	4	6.94444	2	0	5	5.16667	4	0	5	2.16667	5
E3	2.54762	2.5	11.4583	3	0.333333	1	0	5	1	1	1	0	1	0	1	0	1	0	1	4.14286	14.9306	4	18.75	4	6.94444	2	0	5	5.16667	4	0	5	2.16667	5
E4	2.67857	2.75	6.94444	2	3	3	0	5	0.5	1	1	0	1	0	1	0	1	0	1	4.28571	20.4861	3	10.0694	5	15.9722	3	0	5	8.33333	4	0	5	3.33333	5
E4	2.67857	2.75	6.94444	2	3	3	0	5	0.5	1	1	0	1	0	1	0	1	0	1	4.28571	20.4861	3	10.0694	5	15.9722	3	0	5	8.33333	4	0	5	3.33333	5
E5	2.92857	2.75	35.4167	4	0.666667	1	0	5	1.33333	1	1.75	15.1667	4	0	1	0.5	1	0	1	4.28571	18.4028	4	17.3611	4	16.6667	3	0	5	6.16667	4	0	5	2.83333	5
E5	2.92857	2.75	35.4167	4	0.666667	1	0	5	1.33333	1	1.75	15.1667	4	0	1	0.5	1	0	1	4.28571	18.4028	4	17.3611	4	16.6667	3	0	5	6.16667	4	0	5	2.83333	5
F1	2.58333	2.75	28.4722	4	0.666667	1	0.333333	5	2.83333	1	1	0	1	0	1	1.33333	1	0	1	4	24.6528	3	13.5417	4	24.6528	4	0	5	11	3	0	5	5.16667	4
F1	2.58333	2.75	28.4722	4	0.666667	1	0.333333	5	2.83333	1	1	0	1	0	1	1.33333	1	0	1	4	24.6528	3	13.5417	4	24.6528	4	0	5	11	3	0	5	5.16667	4
F2	2.67857	2.75	25	4	0	1	0.166667	5	2.16667	1	1	0	1	0	1	1.33333	1	1	1	4.28571	34.0278	3	9.375	5	20.1389	4	0	5	14.5	3	0	5	4	5
F2	2.67857	2.75	25	4	0	1	0.166667	5	2.16667	1	1	0	1	0	1	1.33333	1	1	1	4.28571	34.0278	3	9.375	5	20.1389	4	0	5	14.5	3	0	5	4	5
F3	2.79762	3.25	49.6528	5	0	1	0	5	4.83333	2	1	0	1	0	1	0	1	2.33333	1	4.14286	19.7917	4	9.72222	5	9.72222	1	0.5	5	8.5	4	0	5	4	5
F3	2.79762	3.25	49.6528	5	0	1	0	5	4.83333	2	1	0	1	0	1	0	1	2.33333	1	4.14286	19.7917	4	9.72222	5	9.72222	1	0.5	5	8.5	4	0	5	4	5
F4	2.7619	2.75	34.0278	4	0.666667	1	0	5	2.5	1	1.25	0	1	0	1	6.83333	2	0	1	4.28571	19.4444	4	11.4583	4	19.0972	3	0.666667	5	8.66667	4	0	5	3.5	5
F4	2.7619	2.75	34.0278	4	0.666667	1	0	5	2.5	1	1.25	0	1	0	1	6.83333	2	0	1	4.28571	19.4444	4	11.4583	4	19.0972	3	0.666667	5	8.66667	4	0	5	3.5	5
F5	2.57143	3	31.9444	4	0	1	0	5	3.66667	2	1	0	1	0	1	0.5	1	1.5	1	3.71429	30.2083	3	16.6667	4	6.59722	1	1.66667	5	13.5	3	0	5	2.66667	5
F5	2.57143	3	31.9444	4	0	1	0	5	3.66667	2	1	0	1	0	1	0.5	1	1.5	1	3.71429	30.2083	3	16.6667	4	6.59722	1	1.66667	5	13.5	3	0	5	2.66667	5
G1	3.2381	4	48.6111	5	4	3	0	5	5.5	3	1	0	1	0	1	0	1	0	1	4.71429	7.63889	5	6.94444	5	22.2222	4	0	5	3.5	5	0	5	8.83333	4
G1	3.2381	4	48.6111	5	4	3	0	5	5.5	3	1	0	1	0	1	0	1	0	1	4.71429	7.63889	5	6.94444	5	22.2222	4	0	5	3.5	5	0	5	8.83333	4
G2	2.97619	3.5	36.4583	4	4	3	0	5	4.5	2	1	0	1	0	1	0	1	0	1	4.42857	10.7639	4	10.4167	4	33.3333	5	0	5	4.16667	5	0	5	10.8333	3
G2	2.97619	3.5	36.4583	4	4	3	0	5	4.5	2	1	0	1	0	1	0	1	0	1	4.42857	10.7639	4	10.4167	4	33.3333	5	0	5	4.16667	5	0	5	10.8333	3
G3	3.10714	3.5	47.2222	5	2.33333	2	0	5	4.16667	2	1.25	2.5	2	0	1	0	1	0	1	4.57143	12.5	4	8.33333	5	26.7361	4	0	5	5.33333	5	0.5	5	5.16667	4
G3	3.10714	3.5	47.2222	5	2.33333	2	0	5	4.16667	2	1.25	2.5	2	0	1	0	1	0	1	4.57143	12.5	4	8.33333	5	26.7361	4	0	5	5.33333	5	0.5	5	5.16667	4
G4	2.79762	3.25	38.1944	4	2	2	0	5	3.83333	2	1	1.5	1	0.333333	1	0	1	0	1	4.14286	27.4306	3	1.73611	5	23.6111	4	0	5	7.66667	4	5.5	4	8.66667	4
G4	2.79762	3.25	38.1944	4	2	2	0	5	3.83333	2	1	1.5	1	0.333333	1	0	1	0	1	4.14286	27.4306	3	1.73611	5	23.6111	4	0	5	7.66667	4	5.5	4	8.66667	4
G5	2.82143	2.75	22.5694	4	1.33333	1	0	5	2.33333	1	1	1	1	0	1	0	1	0	1	4.71429	11.1111	4	4.86111	5	31.9444	5	0	5	5.33333	4	0	5	1.5	5
G5	2.82143	2.75	22.5694	4	1.33333	1	0	5	2.33333	1	1	1	1	0	1	0	1	0	1	4.71429	11.1111	4	4.86111	5	31.9444	5	0	5	5.33333	4	0	5	1.5	5
H1	2.64286	2.5	14.2361	3	0.333333	1	0	5	2	1	1	0	1	0	1	0	1	0	1	4.42857	10.0694	4	28.4722	3	37.8472	5	4	5	3.5	5	0	5	7.16667	4
H1	2.64286	2.5	14.2361	3	0.333333	1	0	5	2	1	1	0	1	0	1	0	1	0	1	4.42857	10.0694	4	28.4722	3	37.8472	5	4	5	3.5	5	0	5	7.16667	4
H2	2.77381	2.75	22.2222	4	0.666667	1	0.166667	5	2.8	1	1	0	1	0	1	0	1	0	1	4.57143	8.68056	5	24.6528	3	30.5556	5	2.83333	5	3.5	5	0	5	6.33333	4
H2	2.77381	2.75	22.2222	4	0.666667	1	0.166667	5	2.8	1	1	0	1	0	1	0	1	0	1	4.57143	8.68056	5	24.6528	3	30.5556	5	2.83333	5	3.5	5	0	5	6.33333	4
H3	3.03571	2.75	25.3472	4	0.333333	1	0	5	1.16667	1	1.5	5	3	0	1	0	1	0	1	4.85714	4.86111	5	6.59722	5	36.1111	5	0.166667	5	0.666667	5	0	5	7.33333	4
H3	3.03571	2.75	25.3472	4	0.333333	1	0	5	1.16667	1	1.5	5	3	0	1	0	1	0	1	4.85714	4.86111	5	6.59722	5	36.1111	5	0.166667	5	0.666667	5	0	5	7.33333	4
H4	2.84524	3.25	23.6111	4	2.66667	2	0	5	3.5	2	1	0	1	0	1	0	1	0	1	4.28571	24.3056	3	12.1528	4	22.9167	4	0.333333	5	7	4	0.166667	5	2.66667	5
H4	2.84524	3.25	23.6111	4	2.66667	2	0	5	3.5	2	1	0	1	0	1	0	1	0	1	4.28571	24.3056	3	12.1528	4	22.9167	4	0.333333	5	7	4	0.166667	5	2.66667	5
H5	2.84524	3.25	42.7083	5	0.333333	1	0	5	4	2	1	1.5	1	0	1	0	1	0	1	4.28571	12.1528	4	15.625	4	12.8472	2	0.5	5	4.66667	5	0	5	3.66667	5
H5	2.84524	3.25	42.7083	5	0.333333	1	0	5	4	2	1	1.5	1	0	1	0	1	0	1	4.28571	12.1528	4	15.625	4	12.8472	2	0.5	5	4.66667	5	0	5	3.66667	5
